# Supplementary material
Source: PubMed Central journal article supplement (PMC5848467)
Supplement: NIHMS917017-supplement-Supp_FigS1-10.pdf [file NIHMS917017-supplement-Supp_FigS1-10.pdf]

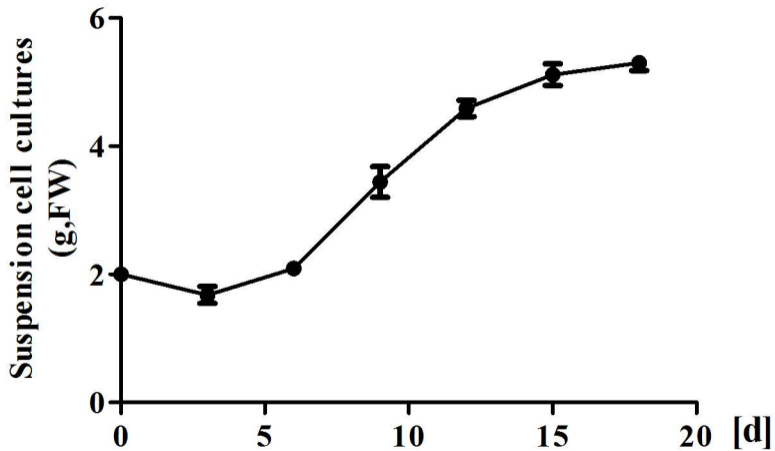

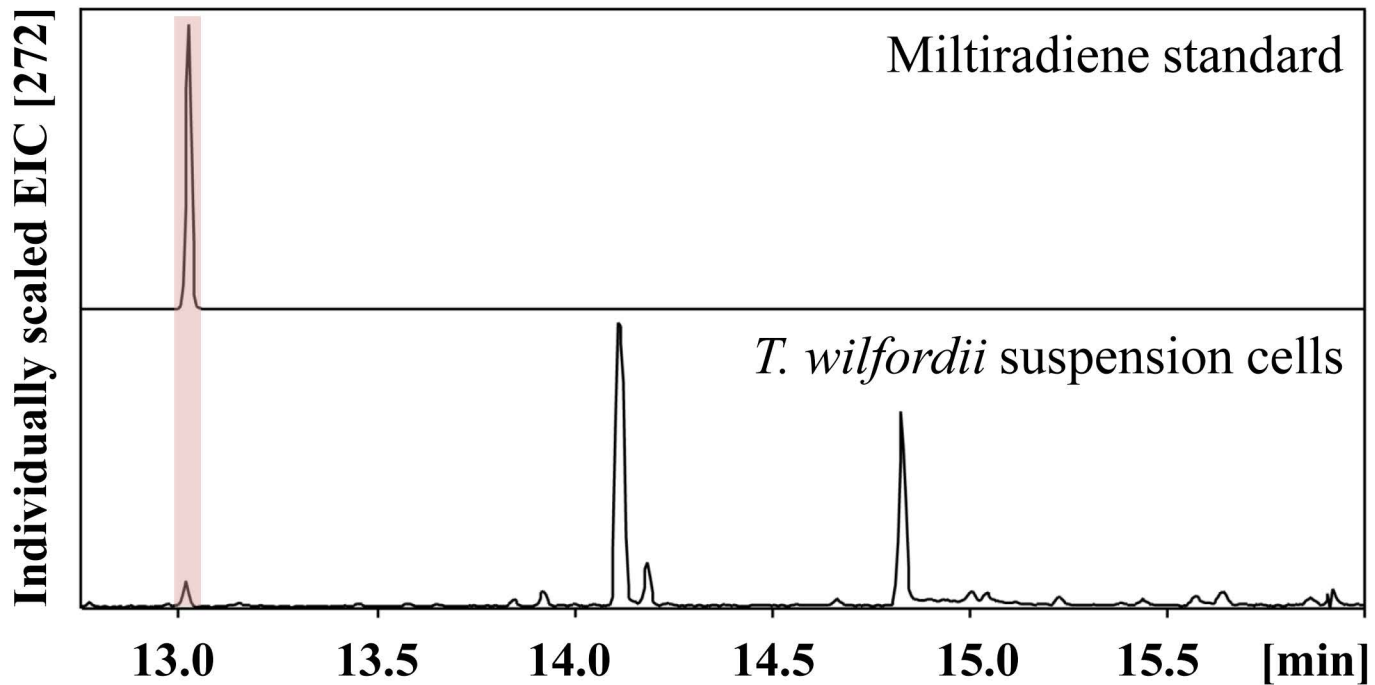

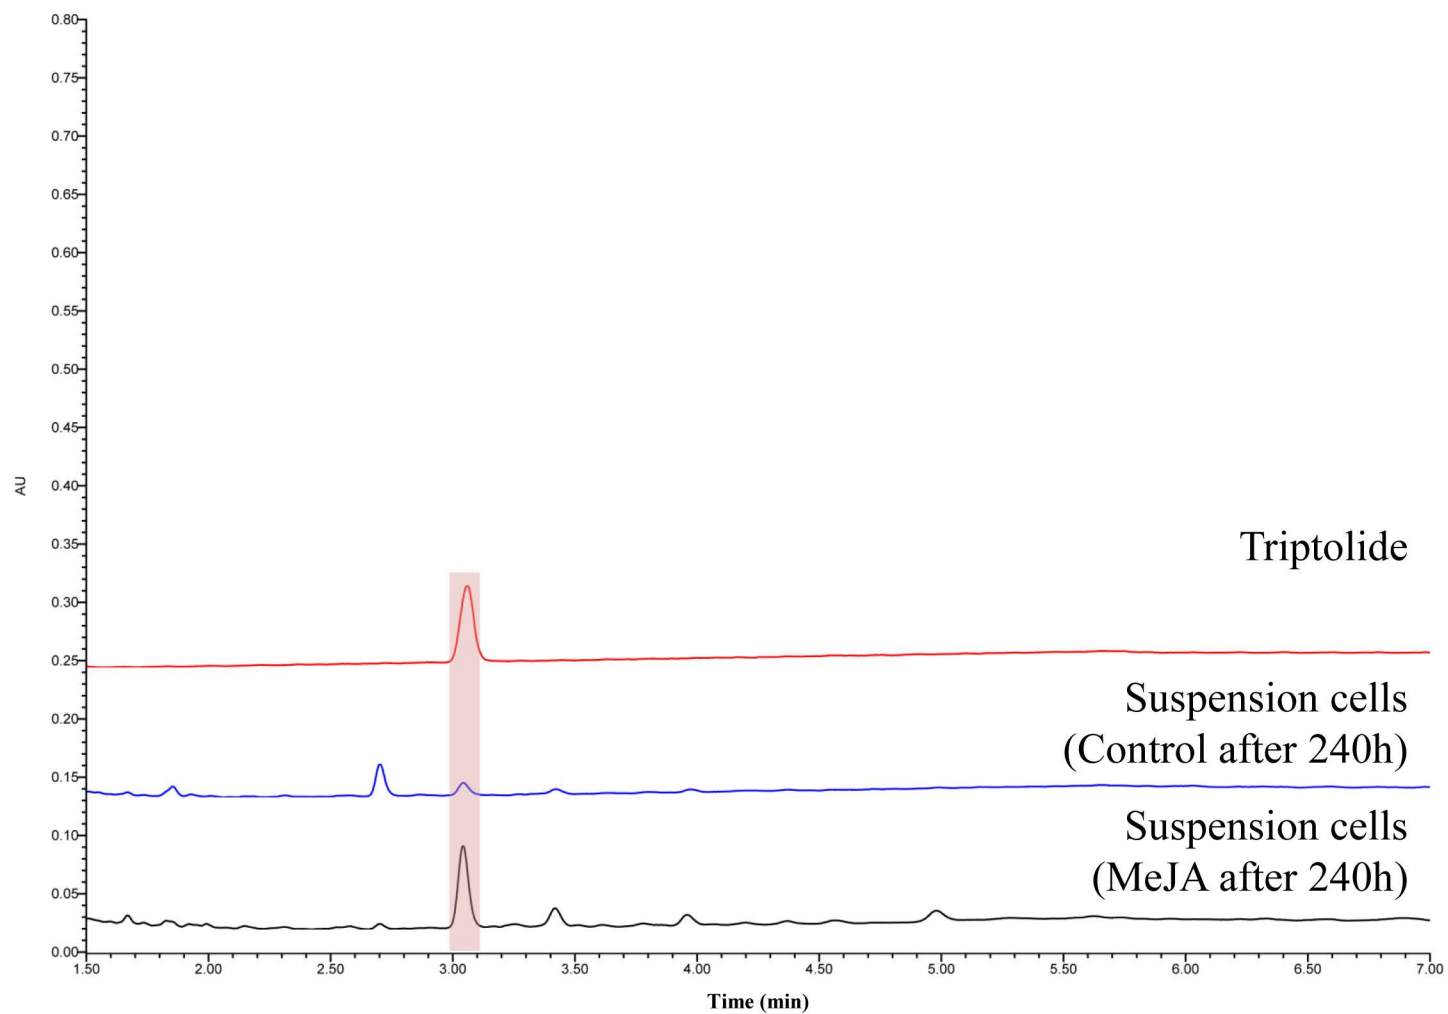

## Transcript Length Distribution

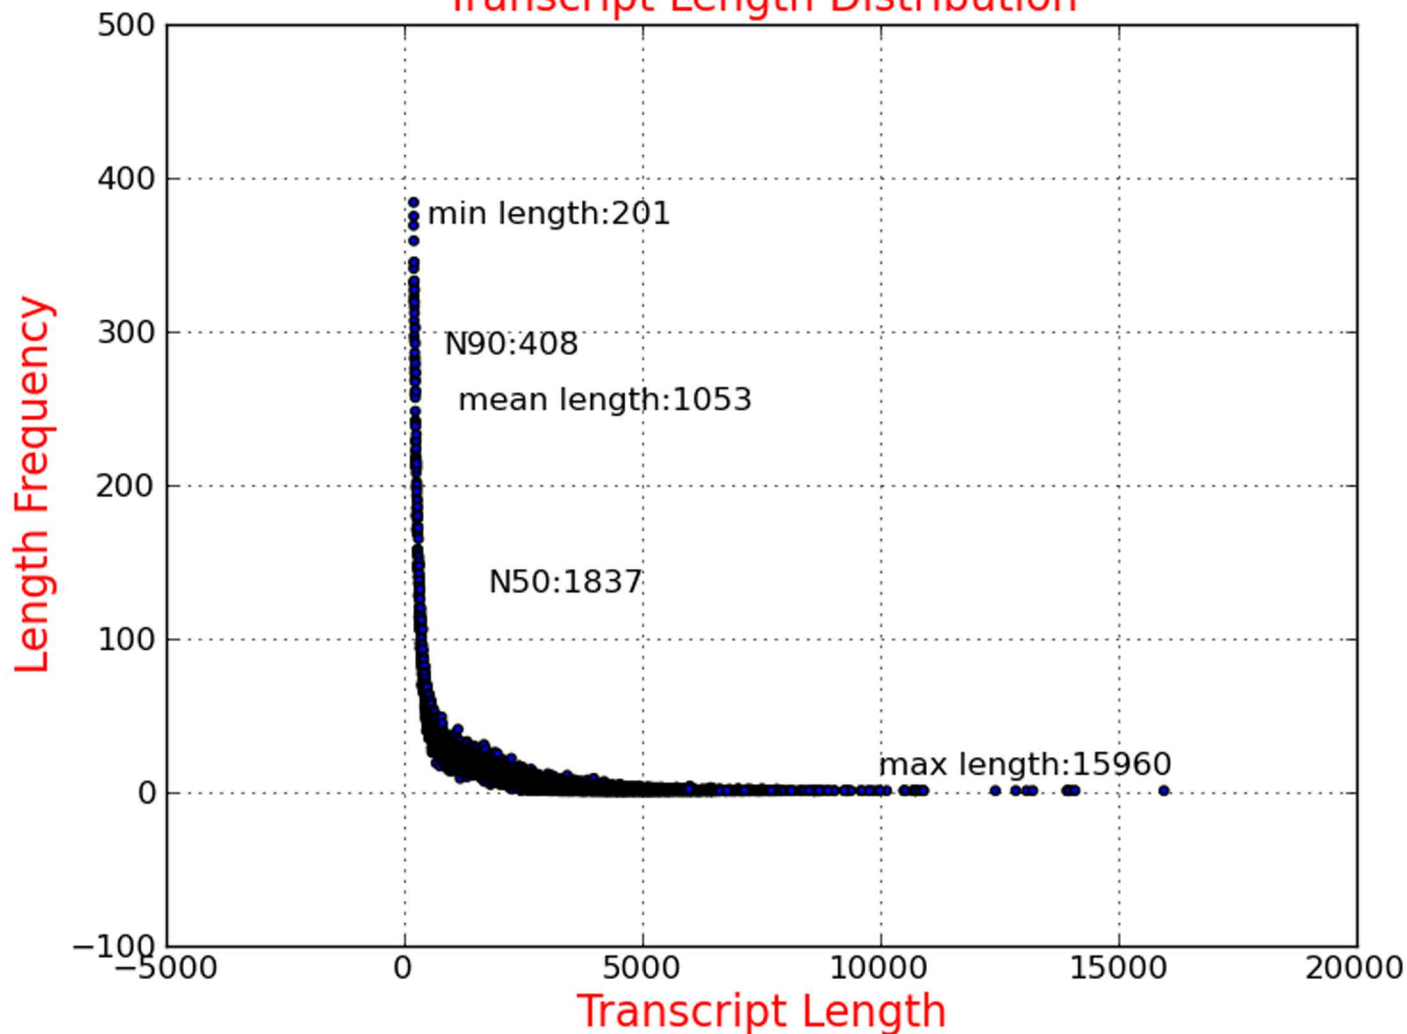

A

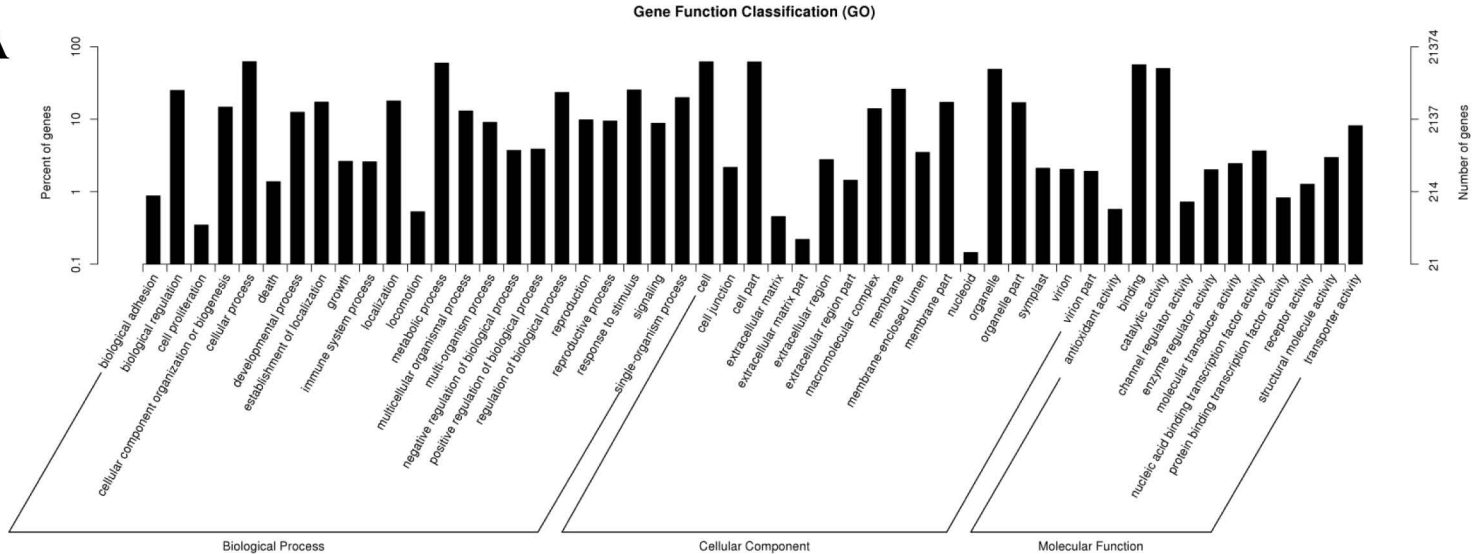

B

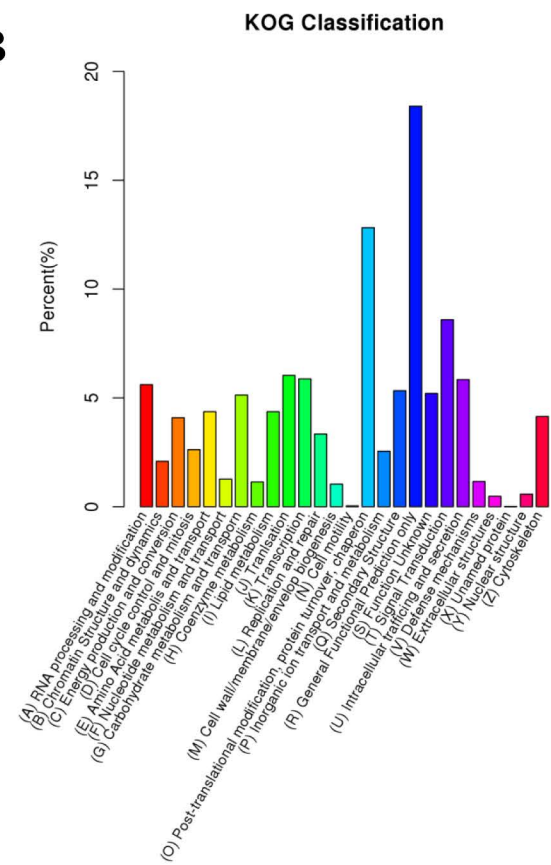

C

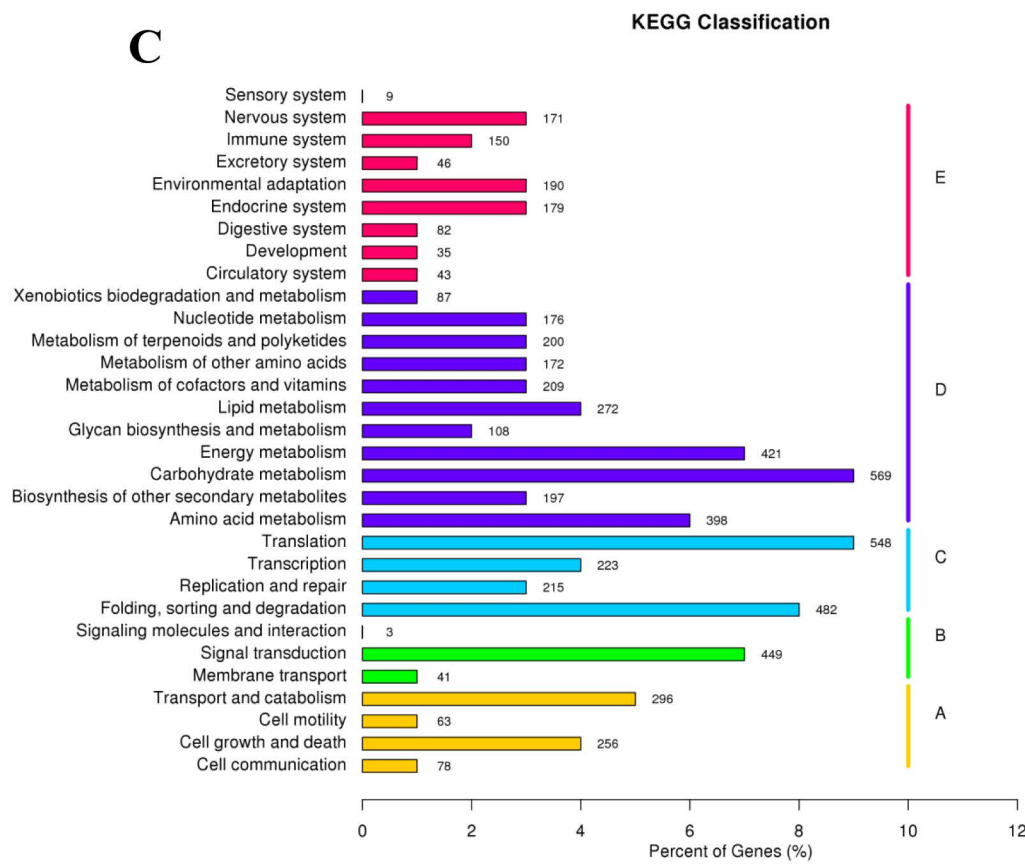

TwTPS7v2 MHSLLMKKVI MYSS... QTTHTVFSSPLHCTI PKSSSFFLDAPVVRHLHCLSGHGAKKKRLHFDI QQGRNAI SKTHTPEDLYAKQEYSVPEI VKDDDKKEEVVKI KEHVDI I KSNLSSMED 116  
TwTPS9v2 MHSLLMKKVI MYSS... QTTHTVFSSPLHCTI PKSSSFFLDAPVARLHCLSGHGAKKKRLHFDI QQGRNAI SKTHTP. DLYAKQEYSVPEI VKGDDKKEEVVKI KEHVDI I KSNLSSMED 115  
TwTPS7 MHSLLMKKVI MYSS... QTTHTVFSSPLHCTI PKSSSFFLDAPVVRHLHCLSGHGAKKKRLHFDI QQGRNAI SKTHTPEDLYAKQEYSVPEI VKDDDKKEEVVKI KEHVDI I KSNLSSMED 116  
TwTPS9 MHSLLMKKVI MYSS... QTTHTVFSSPLHCTI PKSSSFFLDAPVARLHCLSGHGAKKKRLHFDI QQGRNAVSKTHTPDLYAKQEYSVPEI VKDDDKKEEVVKI KEHVDI I KSNLSSMED 116  
TwTPS3v2 MVI MSSHQI FSVSSSSYLHPPLLFPGLSSYTKDKRVCYFDSTRLI CRAI SKPARTTPEYSVGLQNGLPLI KWREI VEDDI QEQEPLKVSLEN. .... QI RQGVDI VKSNLGSNED 112  
TwTPS3 MVI MSSHQI FSVSSSSYLHPPLLFPGLSSYTKDKRVCYFDSTRLI CRAI SKPARTTPEYSVGLQNGLPLI KWREI VEDDI QEQEPLKVSLEN. .... QI RQGVDI VKSNLGSNED 112  
TwCPS2 ..... MDAFGDVVPELTLEN. SI EAEAVKI KEQVNI KSF LGS I ED 39

TwTPS7v2 GEI SI SAYDTAWVALI QDI HN. NGAPQFPSSLVWI AENQLPDGSGVDSRVFLAFDR I NTLACVVALKS VNVHPDKCERGI SFLKENI SMLEKDDSEFMLVGFEGFPVLLDVARRLGI D 235  
TwTPS9v2 GEI SI SAYDTAWVALI QDI HN. NGAPQFPSSLVWI AENQLPDGSGVDSRVFLAFDR I NTLACVVALKS VNVHPDKCERGI SFLKENI SMLEKDDSEFMLVGFEGFPVLLDVARRLGI D 234  
TwTPS7 GEI SI SAYDTAWVALI QDI HN. NGAPQFPSSLVWI AENQLPDGSGVDSRVFLAFDR I NTLACVVALKS VNVHPDKCERGI SFLKENI SMLEKDDSEFMLVGFEGFPVLLDVARRLGI D 235  
TwTPS9 GEI SI SAYDTAWVALI QDI HN. NGAPQFPSSLVWI AENQLPDGSGVDSRVFLAFDR I NTLACVVALKS VNVHPDKCERGI SFLKENI SMLEKDDSEFMLVGFEGFPVLLDVARRLGI D 235  
TwTPS3v2 GEI SI SAYDTAWVALVENI HHPASSQFPSSLQWI ANQLPDGSGVDPYVFLAFDR I NTLACVI ALKKVNI HPNKYKGLS FVKENI SKLEKENEEMPI GF EI AFPSLEMAKGLGI E 232  
TwTPS3 GEI SI SAYDTAWVALVENI HHPASSQFPSSLQWI ANQLPDGSGVDPYVFLAFDR I NTLACVI ALKKVNI HPNKYKGLS FVKENI SKLEKENEEMPI GF EI AFPSLEMAKGLGI E 232  
TwCPS2 GDNSSAYDI AWVAVI EDVYQ. KGVQFPSSLVWI VENQLPDGSGVYSGLFSAVDRTI NTLACVI ALKSNVNI HPEKCKEGLSFLRENI SULEKEKAEFRLGGFELVFPPII EVARRLGI E 158

TwTPS7v2 VPDSPFLQEI YVQRDLKLRIPKDI LHNVPPTLLHSLBAI PDLDVTKLLKLCQDGS LFS PPSSTAMAFI NTKDENCLRYL NYVVQRFNGGAPTVYFYDLFEHNVAVDRLQRLGISRFF 355  
TwTPS9v2 VPDSPFLQEI YVQRDLKLRIPKDI LHNVPPTLLHSLBAI PDLDVTKLLKLCQDGS LFS PPSSTAMAFI NTKDENCLRYL NYVVQRFNGGAPTVYFYDLFEHNVAVDRLQRLGISRFF 354  
TwTPS7 VPDSPFLQEI YVQRDLKLRIPKDI LHNVPPTLLHSLBAI PDLDVTKLLKLCQDGS LFS PPSSTAMAFI NTKDENCLRYL NYVVQRFNGGAPTVYFYDLFEHNVAVDRLQRLGISRFF 355  
TwTPS9 VPDSPFLQEI YVQRDLKLRIPKDI LHNVPPTLLHSLBAI PDLDVTKLLKLCQDGS LFS PPSSTAMAFI NTKDENCLRYL NYVVQRFNGGAPTVYFYDLFEHNVAVDRLQRLGISRFF 355  
TwTPS3v2 I PDDCPALQDI YAKRDLKLRIPKDI MHNVPPTLLHSLBAI PGLDVEKLVRLQCDGSLFS PPSSTACALMHTKDGNGCFSYLNNVQKFNNGVFNVPVDFEHI VSDVRLRLGISRFF 352  
TwTPS3 I PDDCPALQDI YAKRDLKLRIPKDI MHNVPPTLLHSLBGLPGLDVEKLVRLQCDGSLFS PPSSTACALMHTKDGNGCFSYLNNVQKFNNGVFNVPVDFEHI VSDVRLRLGISRFF 352  
TwCPS2 VPCSS TL PDI CAKRNKLRIPKDRMHSVPPTLLYSLEGI QLDVBEKILKLCQDGS LFS PPSSTAFAYMKTKEGFCFTYIKQVTKRFNGAVS MFI DLVERLVAVDRLRLGISRFF 278

**DxDD**

TwTPS7v2 QPEI RECMSYVYRYWTKDGI FCTRNSRVHVDVDTAMGFRLRLHGYEVHPDAFRQFKKGC EFI CYEGQS HPTVTVMY NLYRASQLWFPBEPI LDEAKQFTEKFLGEKRSANKLDDKWI I T 475  
TwTPS9v2 QPEI RECMSYVYRYWTKDGI FCTRNSRVHVDVDTAMGFRLRLHGYEVHPDAFRQFKKGC EFI CYEGQS HPTVTVMY NLYRASQLWFPBEPI LDEAKQFTEKFLGEKRSANKLDDKWI I T 474  
TwTPS7 QPEI RECMSYVYRYWTKDGI FCTRNSRVHVDVDTAMGFRLRLHGYEVHPDAFRQFKKGC EFI CYEGQS HPTVTVMY NLYRASQLWFPBEPI LDEAKQFTEKFLGEKRSANKLDDKWI I T 475  
TwTPS9v2 QPEI RECMSYVYRYWTKDGI FCTRNSRVHVDVDTAMGFRLRLHGYEVHPDAFRQFKKGC EFI CYEGQS HPTVTVMY NLYRASQLWFPBEPI LDEAKQFTEKFLGEKRSANKLDDKWI I T 475  
TwTPS3v2 QPEI KQCLDHVRYWTKDGI CVARNSVQDIDDTAMGFRLRLHGYEVSPDVFQKRFKGCDEFVCFAGCSNQAI TGI YNLYRASQLWFPBEPI LVEAKKFARNFLREKRAVNELDDKWI I T 472  
TwTPS3 QPEI KQCLDHVRYWTKDGI CVARNSVQDIDDTAMGFRLRLHGYEVSPDVFQKRFKGCDEFVCFAGCSNQAI TGI YNLYRASQLWFPBEPI LVEAKKFARNFLREKRAVNELDDKWI I T 472  
TwCPS2 EGEI KEYSFVCRYWTKDGMVWRNSQLRDTCTAMGFRLRLHGYEVFPDVFQNSKGCNEFI CYEGQVNEAIVMS NLYRASQLWFPBEPI LDEAKQFTEKFLREKQASNLDDKWI I T 398

TwTPS7v2 KDLFGEVGFALDVPVYASLPRVEARFFI QHYGGEDDVLDKALYRMPYVNNVYLELAKLDYNYCCALHRTVEGRI QKWYBESKPRDFGI SREGLLRAIFYAASII FEPERSMERLAWAK 595  
TwTPS9v2 KDLFGEVGFALDVPVYASLPRVEARFFI QHYGGEDDVLDKALYRMPYVNNVYLELAKLDYNYCCALHRTVEGRI QKWYBESKPRDFGI SREGLLRAIFYAASII FEPERSMERLAWAK 594  
TwTPS7 KDLFGEVGFALDVPVYASLPRVEARFFI QHYGGEDDVLDKALYRMPYVNNVYLELAKLDYNYCCALHRTVEGRI QKWYBESKPRDFGI SREGLLRAIFYAASII FEPERSMERLAWAK 595  
TwTPS9 KDLFGEVGFALDVPVYASLPRVEARFFI QHYGGEDDVLDKALYRMPYVNNVYLELAKLDYNYCCALHRTVEGRI QKWYBESKPRDFGI SREGLLRAIFYAASII FEPERSMERLAWAK 595  
TwTPS3v2 KDLFGEVGFALDVPVYACLPRVETRLYI EYGGGDVVVI GKSLYRMPYVNNI YLELAKLDYNYCCALHRTVEGRI QKWYBESKPRDFGI SREGLLRAIFYAASII FEPERSMERLAWAK 592  
TwTPS3 KDLFGEVGFALDVPVYACLPRVETRLYI EYGGGDVVVI GKSLYRMPYVNNI YLELAKLDYNYCCALHRTVEGRI QKWYBESKPRDFGI SREGLLRAIFYAASII FEPERSMERLAWAK 592  
TwCPS2 TDISGEVGFALDVPVYACLPRVETRLYI EYGGGDVVVI AKTLYSVPYI DNNVYLELAKLDYNYCCALHRTVEGRI QKWYBESKPRDFGI SREGLLRAIFYAASII FEPERSMERLAWAK 518

TwTPS7v2 TAILLEI I VSYFNEVGNSTEQRI AFTTEFSI RASPMGGYI NGRKLDKI GTTQELI QMLLATI DQFSQDAFAAYGHDI TRHLHNSVKMVLKQVEEGDRWLGEAELLI QTI NLVADHKI AE 715  
TwTPS9v2 TAILLEI I VSYFNEVGNSTEQRI AFTTEFSI RASPMGGYI NGRKLDKI GTTQELI QMLLATI DQFSQDAFAAYGHDI TRHLHNSVKMVLKQVEEGDRWLGEAELLI QTI NLVADHKI AE 714  
TwTPS7 TAILLEI I VSYFNEVGNSTEQRI AFTTEFSI RASPMGGYI NGRKLDKI GTTQELI QMLLATI DQFSQDAFAAYGHDI TRHLHNSVKMVLKQVEEGDRWLGEAELLI QTI NLVADHKI AE 715  
TwTPS9 TAILLEI I VSYFNEVGNSTEQRI AFTTEFSI RASPMGGYI NGRKLDKI GTTQELI QMLLATI DQFSQDAFAAYGHDI TRHLHNSVKMVLKQVEEGDRWLGEAELLI QTI NLVADHKI AE 715  
TwTPS3v2 TAILLEI ASYFK. . . NSREEREFVNEFKQFPKTRG. YI KGRRLDGKMATKEVI EMVFAALNHFSLDL VVHGQDI THHLYSQVVKVLTQVEEGDRREGEAELLI QTI NLVAGHTPSQ 708  
TwTPS3 TAILLEI ASYFK. . . NSREEREFVNEFKQFPKTRG. YI NARRLDGKMATKEVI EMVFAALNHFSLDL VVHGQDI THHLYSQVVKVLTQVEEGDRREGEAELLI QTI NLVAGHTPSQ 708  
TwCPS2 TAILLEI ETWASYFIN. . . STKQRKSFVNEFRKCVRNER. . . . MNETNPTTEKLI QAI LETLNQFCQDI MVT. EDI VTRHLHGLVEKVLITQVEEGDRLTCEAELLAQTI NFAAGYKVF 630

TwTPS7v2 KLFMGHTNYEQLFSLTNKVCYSLG. HEELQNNRE. .... LEHDMQRLVQLVLTN. . . SSDGSDSI KKTFLAVAKRFYYIAFVDPETVNVHI AKVLFERV 806  
TwTPS9v2 KLFMGHTNYEQLFSLTNKVCYSLG. HEELQNNRE. .... LEHDMQRLVQLVLTN. . . SSDGSDSI KKTFLAVAKRFYYIAFVDPETVNVHI AKVLFERV 805  
TwTPS7 KLFMGHTNYEQLFSLTNKVCYSLG. HEELQNNRE. .... LEHDMQRLVQLVLTN. . . SSDGSDSI KKTFLAVAKRFYYIAFVDPETVNVHI AKVLFERV 806  
TwTPS9 KLFMGHTNYEQLFSLTNKVCYSLG. HEELQNNRE. .... LEHDMQRLVQLVLTN. . . SSDGSDSI KKTFLAVAKRFYYIAFVDPETVNVHI AKVLFERV 806  
TwTPS3v2 ELLY. . . . ERLFKLTNKVCHQLGHYHHLNKDKQPQVEDNNGYNNSPESI SKLQI ESDMRELVLVLTN. . . SSDGSDSI KCTFLTITKSFYYIAFTHPGTVNVHI AKVLFERV 816  
TwTPS3 ELLY. . . . ERLFKLTNKVCHQLGRHHLNKDKQLQVQDNGYNNSPESI SKLQI ESDMRELVLVLTN. . . SSDGSDSI KCTFLTITKSFYYIAFTHPGTVNVHI AKVLFERV 816  
TwCPS2 EFS. . . LYVQLI NITNRI GSQLG. REQERKNKNGQDS. .... CNDNPHRI TTPQI ERDMQRLVQLVLTN. . . SSDGSDSI KCTFLTITKSFYYIAFTHPGTVNVHI AKVLFERV 737

|           |            |          |        |            |         |        |        |       |      |       |     |      |      |       |      |       |       |       |       |       |         |      |     |      |         |           |        |      |   |     |     |     |    |       |      |   |   |   |     |   |   |   |   |   |   |     |   |   |   |   |   |   |   |   |   |   |   |   |   |   |   |    |    |   |   |   |   |   |   |   |   |   |   |   |   |   |   |   |   |   |   |   |   |     |     |   |   |   |   |   |   |   |   |   |   |   |   |   |   |   |   |     |     |     |     |
|-----------|------------|----------|--------|------------|---------|--------|--------|-------|------|-------|-----|------|------|-------|------|-------|-------|-------|-------|-------|---------|------|-----|------|---------|-----------|--------|------|---|-----|-----|-----|----|-------|------|---|---|---|-----|---|---|---|---|---|---|-----|---|---|---|---|---|---|---|---|---|---|---|---|---|---|---|----|----|---|---|---|---|---|---|---|---|---|---|---|---|---|---|---|---|---|---|---|---|-----|-----|---|---|---|---|---|---|---|---|---|---|---|---|---|---|---|---|-----|-----|-----|-----|
| TwKSL1    | MMSLSHPNWT | RHSSLPL  | SAA    | LPKSKSEVL  | TET     | NATI   | LYFQET | KERI  | KKMF | DKT   | QLS | VS   | AYDT | AWVAM | VSS  | PNSR  | QAPCF | PECV  | NVLL  | DNQLS | DGS     | VGL  | PPH | PSL  | VKDALSS | 112       |        |      |   |     |     |     |    |       |      |   |   |   |     |   |   |   |   |   |   |     |   |   |   |   |   |   |   |   |   |   |   |   |   |   |   |    |    |   |   |   |   |   |   |   |   |   |   |   |   |   |   |   |   |   |   |   |   |     |     |   |   |   |   |   |   |   |   |   |   |   |   |   |   |   |   |     |     |     |     |
| TwTPS16v2 | MMSLSHPNCI | RHSSLPLI | SATL   | PKSKSEVL   | TET     | DATI   | LYFQET | KERI  | KKMF | DKA   | ELS | VS   | AYDT | AWVAM | VSS  | PNSR  | QAPCF | PECV  | NVLL  | DNQLS | DGS     | VGL  | PPH | PSL  | VKDALSS | 112       |        |      |   |     |     |     |    |       |      |   |   |   |     |   |   |   |   |   |   |     |   |   |   |   |   |   |   |   |   |   |   |   |   |   |   |    |    |   |   |   |   |   |   |   |   |   |   |   |   |   |   |   |   |   |   |   |   |     |     |   |   |   |   |   |   |   |   |   |   |   |   |   |   |   |   |     |     |     |     |
| TwTPS16   | MMSLSHPNCI | RHSSLPLI | S      | ALPKSKSEVL | TET     | DATI   | LYFQET | KERI  | KKMF | DKT   | QLS | VS   | AYDT | AWVAM | VSS  | PNSR  | QAPCF | PECV  | NVLL  | DNQLS | DGS     | VGL  | PPH | PSL  | VKDALSS | 111       |        |      |   |     |     |     |    |       |      |   |   |   |     |   |   |   |   |   |   |     |   |   |   |   |   |   |   |   |   |   |   |   |   |   |   |    |    |   |   |   |   |   |   |   |   |   |   |   |   |   |   |   |   |   |   |   |   |     |     |   |   |   |   |   |   |   |   |   |   |   |   |   |   |   |   |     |     |     |     |
| TwKSL1    | TLACLLAL   | KRVGL    | GEQQ   | MTKGL      | QFI     | ESNFTS | IN     | EEQHT | PI   | GFNI  | I   | FPGM | ETAI | DMNL  | NLPL | RSEDI | NVML  | HNRD  | LELR  | RRNK  | LEGREAY | LAYV | SEG | MGKL | QD      | WEMVMKYQR | 224    |      |   |     |     |     |    |       |      |   |   |   |     |   |   |   |   |   |   |     |   |   |   |   |   |   |   |   |   |   |   |   |   |   |   |    |    |   |   |   |   |   |   |   |   |   |   |   |   |   |   |   |   |   |   |   |   |     |     |   |   |   |   |   |   |   |   |   |   |   |   |   |   |   |   |     |     |     |     |
| TwTPS16v2 | TLACLLAL   | KRVGL    | GEQQ   | MTKGL      | QFI     | ESNFTS | IN     | EEQHT | PI   | GFNI  | I   | FPGM | ETAI | DMNL  | NLPL | RSEDI | NVML  | HNRD  | LELR  | RRNK  | LEGREAY | LAYV | SEG | MGKL | QD      | WEMVMKYQR | 224    |      |   |     |     |     |    |       |      |   |   |   |     |   |   |   |   |   |   |     |   |   |   |   |   |   |   |   |   |   |   |   |   |   |   |    |    |   |   |   |   |   |   |   |   |   |   |   |   |   |   |   |   |   |   |   |   |     |     |   |   |   |   |   |   |   |   |   |   |   |   |   |   |   |   |     |     |     |     |
| TwTPS16   | TLACLLAL   | KRVGL    | GEQQ   | MTKGL      | QFI     | ESNFTS | IN     | EEQHT | PI   | GFNI  | I   | FPGM | ETAI | DMNL  | NLPL | RSEDI | NVML  | HNRD  | LELR  | RRNK  | LEGREAY | LAYV | SEG | MGKL | QD      | WEMVMKYQR | 223    |      |   |     |     |     |    |       |      |   |   |   |     |   |   |   |   |   |   |     |   |   |   |   |   |   |   |   |   |   |   |   |   |   |   |    |    |   |   |   |   |   |   |   |   |   |   |   |   |   |   |   |   |   |   |   |   |     |     |   |   |   |   |   |   |   |   |   |   |   |   |   |   |   |   |     |     |     |     |
| TwKSL1    | KNGSLF     | NSPST    | TAAALS | HLGN       | AGCFHYI | NSLI   | AKF    | GNAV  | PTV  | YPS   | DKY | ALL  | CM   | ESLER | LGI  | DR    | HFS   | KEI   | RDVLE | EET   | YRC     | WL   | QG  | DEE  | FS      | DAD       | TCAFRI | LRVH | G | YEV | SSD | 336 |    |       |      |   |   |   |     |   |   |   |   |   |   |     |   |   |   |   |   |   |   |   |   |   |   |   |   |   |   |    |    |   |   |   |   |   |   |   |   |   |   |   |   |   |   |   |   |   |   |   |   |     |     |   |   |   |   |   |   |   |   |   |   |   |   |   |   |   |   |     |     |     |     |
| TwTPS16v2 | KNGSLF     | NSPST    | TAAALS | HLGN       | AGCFHYI | NSLI   | AKF    | GNAV  | PTV  | YPS   | DKY | ALL  | CM   | ESLER | LGI  | DS    | HFS   | QEI   | RDVLE | EET   | YRC     | WL   | QG  | DEE  | FS      | DAD       | TCAFRI | LRVH | G | YEV | SSD | 336 |    |       |      |   |   |   |     |   |   |   |   |   |   |     |   |   |   |   |   |   |   |   |   |   |   |   |   |   |   |    |    |   |   |   |   |   |   |   |   |   |   |   |   |   |   |   |   |   |   |   |   |     |     |   |   |   |   |   |   |   |   |   |   |   |   |   |   |   |   |     |     |     |     |
| TwTPS16   | KNGSLF     | NSPST    | TAAALS | HLGN       | AGCFHYI | NSLI   | AKF    | GNAV  | PTV  | YPS   | DKY | ALL  | CM   | ESLER | LGI  | DS    | HFS   | KEI   | RDVLE | EET   | YRC     | WL   | QG  | DEE  | FS      | DAD       | TCAFRI | LRVH | G | YEV | SSD | 335 |    |       |      |   |   |   |     |   |   |   |   |   |   |     |   |   |   |   |   |   |   |   |   |   |   |   |   |   |   |    |    |   |   |   |   |   |   |   |   |   |   |   |   |   |   |   |   |   |   |   |   |     |     |   |   |   |   |   |   |   |   |   |   |   |   |   |   |   |   |     |     |     |     |
| TwKSL1    | PLAQYAE    | HF       | S      | FGGHL      | KDF     | STALE  | LFK    | ASQ   | FVI  | FPEES | GLE | QMS  | WTN  | QFL   | KQ   | EFS   | NGT   | TRADR | F     | S     | KH      | F    | S   | I    | EVHDT   | L         | K      | F    | P | F   | HAN | VER | LA | HRRNI | EHHH | V | D | N | TRI | F | K | T | S | Y | C | 448 |   |   |   |   |   |   |   |   |   |   |   |   |   |   |   |    |    |   |   |   |   |   |   |   |   |   |   |   |   |   |   |   |   |   |   |   |   |     |     |   |   |   |   |   |   |   |   |   |   |   |   |   |   |   |   |     |     |     |     |
| TwTPS16v2 | PLIQYAE    | HF       | S      | FGGHL      | KDF     | STALE  | LFK    | ASQ   | FVI  | FPEES | GLE | QMS  | WTN  | QFL   | KQ   | EFS   | NGT   | TRADR | F     | S     | KY      | F    | S   | I    | EVHDT   | L         | K      | F    | P | F   | HAN | VER | LA | HRRNI | EHHH | V | D | N | TRI | L | K | T | S | Y | C | 448 |   |   |   |   |   |   |   |   |   |   |   |   |   |   |   |    |    |   |   |   |   |   |   |   |   |   |   |   |   |   |   |   |   |   |   |   |   |     |     |   |   |   |   |   |   |   |   |   |   |   |   |   |   |   |   |     |     |     |     |
| TwTPS16   | PLIQYAE    | HF       | S      | FGGHL      | KDF     | STALE  | LFK    | ASQ   | FVI  | FPEES | GLE | QMS  | WTN  | QFL   | KQ   | EFS   | NGT   | TRADR | F     | S     | KY      | F    | S   | I    | EVHDT   | L         | K      | F    | P | F   | HAN | VER | LA | HRRNI | EHHH | V | D | N | TRI | L | K | T | S | Y | C | 447 |   |   |   |   |   |   |   |   |   |   |   |   |   |   |   |    |    |   |   |   |   |   |   |   |   |   |   |   |   |   |   |   |   |   |   |   |   |     |     |   |   |   |   |   |   |   |   |   |   |   |   |   |   |   |   |     |     |     |     |
| TwKSL1    | FSNI       | S        | NAD    | FL         | QLA     | VED    | F      | N     | CQSI | HREEL | KHL | ERV  | V    | V     | E    | S     | KL    | DRL   | K     | F     | AR      | Q    | M   | A    | C       | Y         | F      | S    | A | A   | G   | T   | S  | F     | S    | P | E | L | S   | D | A | R | I | S | V | A   | K | N | T | V | L | T | T | V | V | D | D | F | F | D | I | GG | S  | E | E | E | L | A | N | L | V | H | L | L | E | K | V | D | A | N | G | S | P | 560 |     |   |   |   |   |   |   |   |   |   |   |   |   |   |   |   |   |     |     |     |     |
| TwTPS16v2 | FSNI       | S        | NAD    | FL         | QLA     | VED    | F      | N     | CQSI | HREEL | KHL | ERV  | V    | V     | E    | T     | KL    | DRL   | K     | F     | AR      | Q    | M   | A    | C       | Y         | F      | S    | A | A   | G   | T   | C  | F     | S    | P | E | L | S   | D | A | R | I | S | V | A   | K | N | S | V | L | T | T | V | V | A | D | D | F | F | D | I  | VG | S | E | E | E | L | A | N | L | V | H | L | L | E | N | V | D | A | N | G | S | P   | 560 |   |   |   |   |   |   |   |   |   |   |   |   |   |   |   |   |     |     |     |     |
| TwTPS16   | FSNI       | S        | NAD    | FL         | QLA     | ED     | F      | N     | CQSI | HREEL | KHL | ERV  | V    | V     | E    | T     | KL    | DRL   | K     | F     | AR      | Q    | M   | A    | C       | Y         | F      | S    | A | A   | G   | T   | C  | F     | S    | P | E | L | S   | D | A | R | I | S | V | A   | K | N | S | V | L | T | T | V | V | A | D | D | F | F | D | I  | VG | S | E | E | E | L | A | N | L | V | H | L | L | E | N | V | D | A | N | G | S | P   | 559 |   |   |   |   |   |   |   |   |   |   |   |   |   |   |   |   |     |     |     |     |
| TwKSL1    | HYCSE      | Q        | VEI    | I          | FS      | AL     | R      | N     | T    | CEI   | R   | D    | K    | A     | L    | A     | V     | Q     | G     | R     | S       | V    | T   | H    | H       | V         | E      | I    | V | L   | D   | L   | L  | K     | S    | M | L | R | E   | A | E | V | A | R | N | K   | V | V | P | T | L | D | E | Y | V | E | N | G | Y | V | S | M  | A  | L | G | P | I | V | L | S | T | V | Y | L | I | G | P | K | V | S | E | E | V | V   | R   | S | P | E | F | H | N | L | F | K | L | M | S | I | T | C | G | 672 |     |     |     |
| TwTPS16v2 | HYCSE      | P        | VEI    | I          | FS      | AL     | R      | S     | T    | CEI   | G   | D    | K    | A     | L    | A     | V     | Q     | G     | R     | S       | V    | T   | H    | H       | V         | E      | I    | E | M   | V   | L   | D  | L     | L    | K | S | A | L   | R | E | A | E | V | A | R   | N | K | V | V | P | T | F | D | E | Y | V | E | N | G | Y | V  | S  | M | A | L | G | P | I | V | L | P | A | V | Y | L | I | G | P | K | V | S | E | E   | V   | V | R | S | P | E | F | H | N | L | F | K | L | M | S | I | C | G   | 672 |     |     |
| TwTPS16   | HYCSE      | P        | VEI    | I          | FS      | AL     | R      | S     | T    | CEI   | G   | D    | K    | A     | L    | A     | V     | Q     | G     | R     | S       | V    | T   | H    | H       | V         | E      | I    | E | M   | V   | L   | D  | L     | L    | K | S | A | L   | R | E | A | E | V | A | R   | N | K | V | V | P | T | F | D | E | Y | V | E | N | G | Y | V  | S  | M | A | L | G | P | I | V | L | P | A | V | Y | L | I | G | P | K | V | S | E | E   | V   | V | R | S | P | E | F | H | N | L | F | K | L | M | S | I | C | G   | 671 |     |     |
| TwKSL1    | RLI        | N        | D      | T          | R       | T      | F      | K     | R    | E     | Y   | E    | D    | G     | K    | L     | N     | S     | V     | L     | L       | H    | M   | I    | H       | S         | G      | S    | G | A   | T   | E   | E  | E     | A    | I | E | K | I   | R | G | L | I | A | D | G   | R | R | E | L | L | G | L | V | L | Q | E | K | D | S | V | V  | P  | R | A | C | K | D | L | F | V | K | M | V | Q | V | L | H | L | F | Y | D | G | D   | G   | Y | T | S | A | D | M | L | N | A | V | N | A | L | I | R | E | P   | I   | S   | 780 |
| TwTPS16v2 | RLI        | N        | D      | T          | R       | T      | F      | K     | R    | E     | S   | E    | A    | G     | K    | L     | N     | S     | V     | L     | L       | H    | M   | I    | H       | S         | G      | S    | G | T   | E   | E   | E  | A     | V    | E | K | I | R   | G | L | I | A | D | G | R   | R | E | L | L | R | L | V | L | Q | E | K | D | S | I | V | P  | R  | A | C | K | D | L | F | V | K | M | V | Q | V | L | H | L | F | Y | D | G | D | G   | F   | S | S | P | D | M | L | N | A | V | N | A | L | I | R | E | P | I   | S   | 780 |     |
| TwTPS16   | RLI        | N        | D      | T          | R       | T      | F      | K     | R    | E     | S   | E    | A    | G     | K    | L     | N     | S     | V     | L     | L       | H    | M   | I    | H       | S         | G      | S    | G | T   | E   | E   | E  | A     | V    | E | K | I | R   | G | L | I | A | D | G | R   | R | E | L | L | R | L | V | L | Q | E | K | D | S | V | V | P  | R  | A | C | K | D | L | F | V | K | M | V | Q | V | L | H | L | F | Y | D | G | D | G   | F   | S | S | P | D | M | L | N | A | V | N | A | L | I | R | E | P | I   | S   | 779 |     |

DDxxD

**A**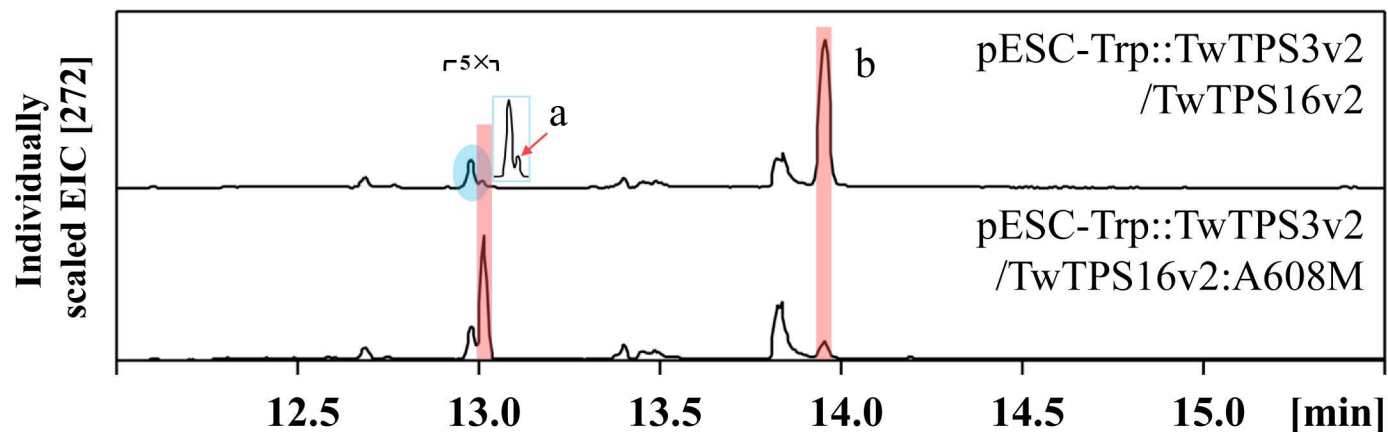**B**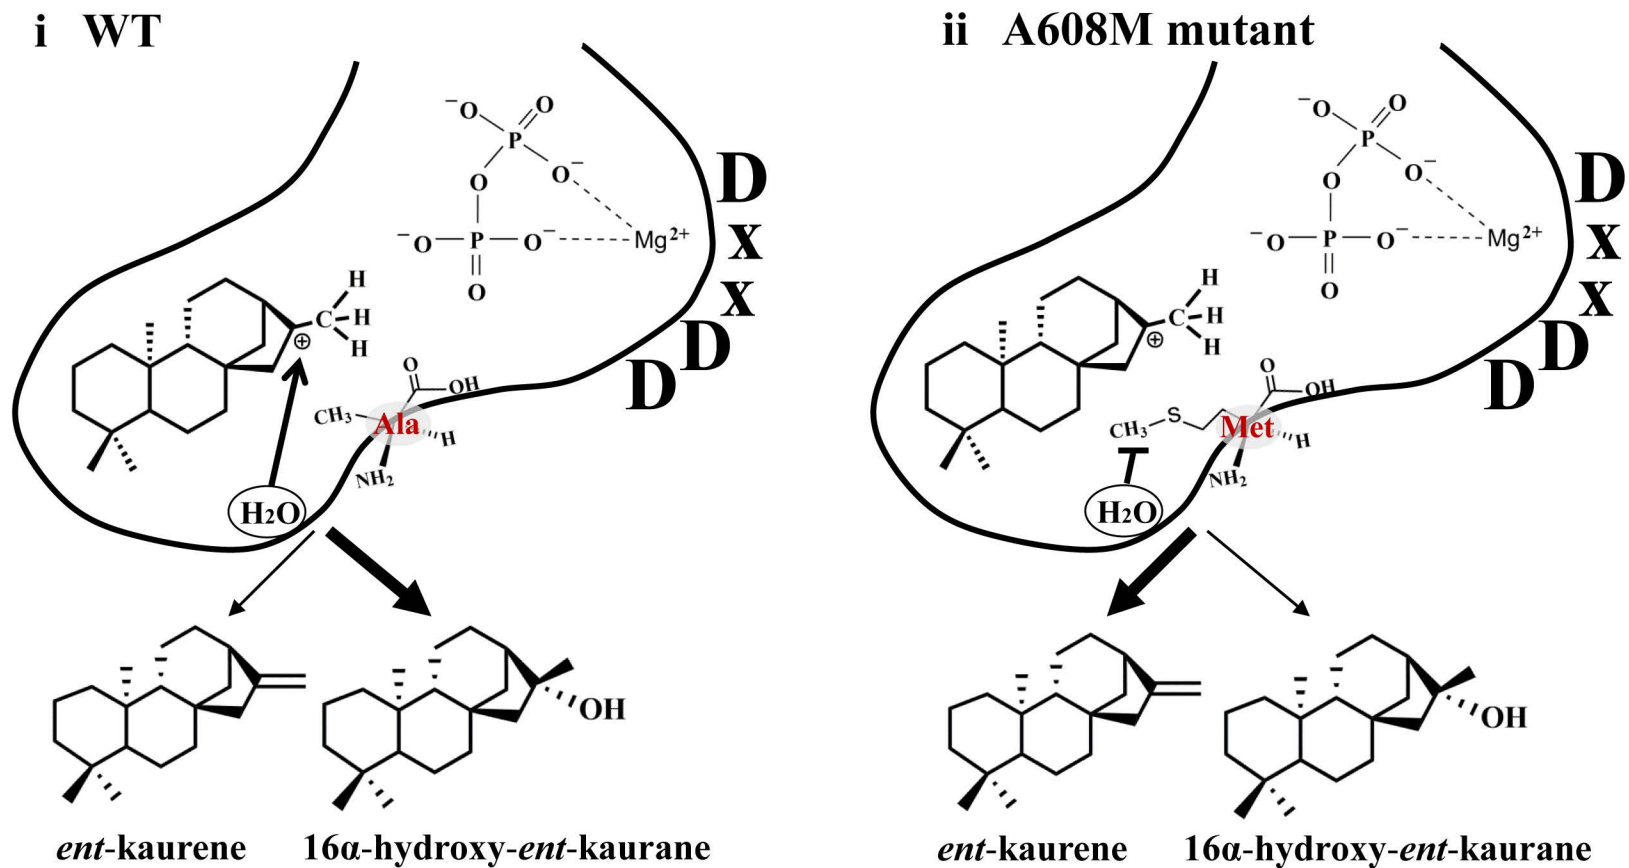



**A**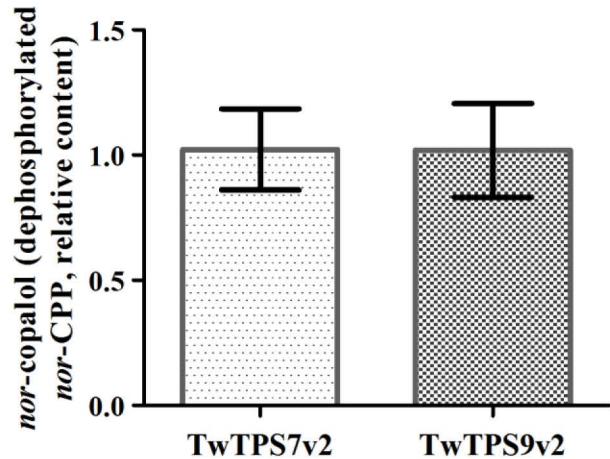**B**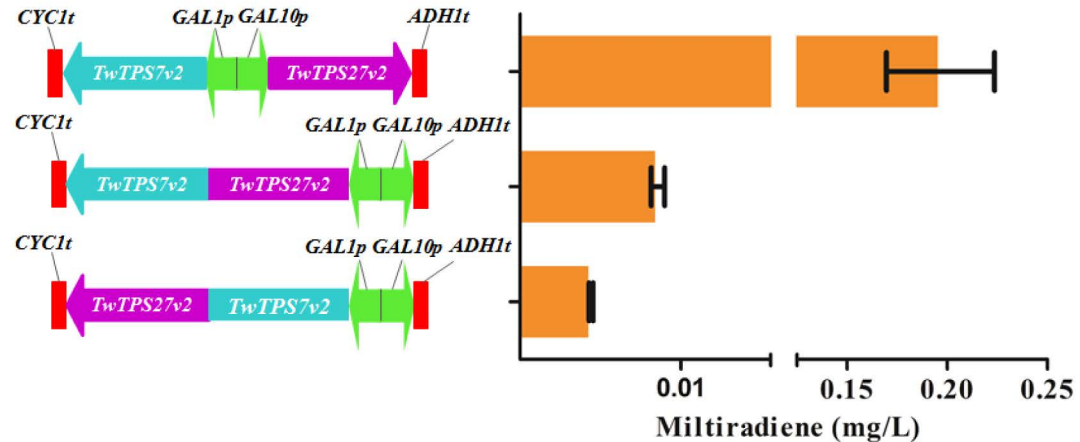

**pGADT7-T**

+

**pGBKT7-53**

**pGADT7-TwTPS7v2**

+

**pGBKT7-TwTPS27v2**

**pGADT7-TwTPS9v2**

+

**pGBKT7-TwTPS27v2**

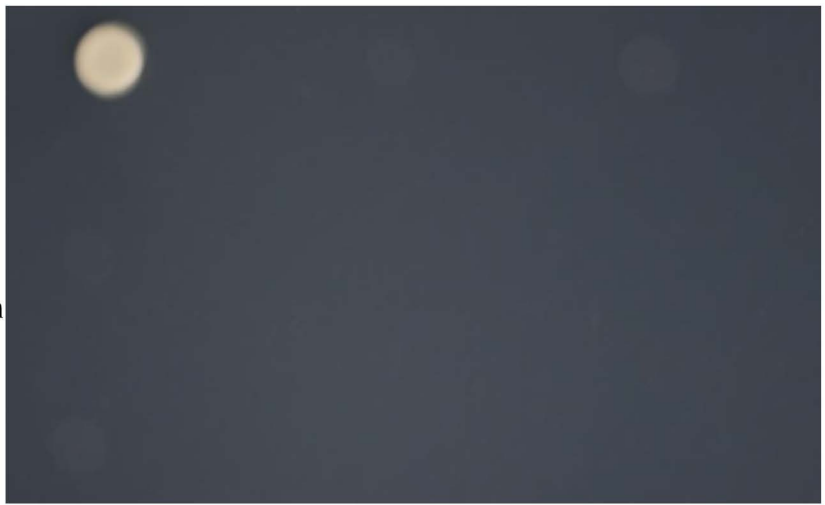

**pGADT7-T**  
+  
**pGBKT7-Lam**

**pGADT7**  
+  
**pGBKT7**
